# Supplementary material for: Gene Expression Analysis Links Autocrine Vasoactive Intestinal Peptide and ZEB1 in Gastrointestinal Cancers
Source: MDPI journal article supplement (doi:10.3390/cancers15133284), 2023-06-22
Supplement: s1 [file s1]

**Supplemental Table 1. R-Values in Target-Gene Set by Cancer Hallmark with Heat Map:** Positive associations denoted in red, negative in blue with strength of association based on color intensity. R-value listed in each column for which there is an associated cancer hallmark.

| Gene    | Activating<br>Invasion<br>and<br>Metastasis | Avoiding<br>immune<br>Destruction | Deregulating<br>Cellular<br>Energetics | Enabling<br>Replicative<br>Immortality | Evading<br>Growth<br>Suppressors | Genome<br>Instability<br>&<br>Mutation | Inducing<br>Angiogenesis | Resisting<br>Cell<br>Death | Sustaining<br>Proliferative<br>Signaling | Tumor-<br>promoting<br>Inflammation |
|---------|---------------------------------------------|-----------------------------------|----------------------------------------|----------------------------------------|----------------------------------|----------------------------------------|--------------------------|----------------------------|------------------------------------------|-------------------------------------|
| ABCC1   | -                                           | -                                 | -0.1588                                | -                                      | -                                | -                                      | -                        | -                          | -                                        | -                                   |
| ABCC4   | -                                           | -                                 | -                                      | -                                      | -                                | -                                      | -                        | -                          | -0.01755                                 | -                                   |
| ABCF1   | -                                           | -                                 | -                                      | -                                      | -                                | -                                      | -                        | -                          | -                                        | -                                   |
| ABCG2   | -                                           | -                                 | -                                      | 0.2541                                 | -                                | -                                      | -                        | -                          | -                                        | -                                   |
| ABI1    | -                                           | -                                 | -                                      | -                                      | -                                | -                                      | 0.03186                  | -                          | -                                        | -                                   |
| ABL1    | -                                           | -                                 | -                                      | -                                      | -                                | -                                      | -                        | -                          | 0.1138                                   | -                                   |
| ACKR2   | -                                           | -                                 | -                                      | -                                      | -                                | -                                      | -                        | -                          | -                                        | -0.03616                            |
| ACKR3   | -                                           | -                                 | -                                      | -                                      | -                                | -                                      | -                        | -                          | -                                        | 0.08758                             |
| ACOT12  | -                                           | -                                 | 0.01534                                | -                                      | -                                | -                                      | -                        | -                          | -                                        | -                                   |
| ACSL3   | -                                           | -                                 | -0.0651                                | -                                      | -                                | -                                      | -                        | -                          | -0.0651                                  | -                                   |
| ACTG2   | -                                           | -                                 | -                                      | -                                      | -                                | -                                      | -                        | -                          | 0.1932                                   | -                                   |
| ADH1A   | -                                           | -                                 | 0.1108                                 | -                                      | -                                | -                                      | -                        | -                          | -                                        | -                                   |
| ADM     | -                                           | -                                 | -                                      | -                                      | -                                | -                                      | -0.01876                 | -                          | -                                        | -                                   |
| ADORA2A | -                                           | 0.05374                           | -                                      | -                                      | -                                | -                                      | -                        | -                          | -                                        | -                                   |
| ADORA2B | -                                           | 0.08245                           | -                                      | -                                      | -                                | -                                      | -                        | -                          | -                                        | -                                   |
| AGO2    | -                                           | -                                 | -                                      | -                                      | -                                | -0.1426                                | -                        | -                          | -0.1426                                  | -                                   |
| AGO4    | -                                           | -                                 | -                                      | -                                      | -                                | 0.05091                                | -                        | -                          | 0.05091                                  | -                                   |
| AIMP2   | -                                           | -                                 | -                                      | -                                      | -                                | -                                      | -                        | -                          | -0.1091                                  | -                                   |
| AKT1    | -0.13840                                    | -                                 | -                                      | -                                      | -                                | -                                      | -                        | -                          | -0.13840                                 | -                                   |
| AKT1S1  | -                                           | -                                 | -0.0811                                | -                                      | -                                | -                                      | -                        | -                          | -0.0811                                  | -                                   |
| AKT2    | -                                           | -                                 | -                                      | -                                      | -                                | -                                      | -                        | -                          | -0.1932                                  | -                                   |
| AKT3    | -                                           | -                                 | -                                      | -                                      | -                                | -                                      | -                        | -                          | 0.1078                                   | -                                   |
| ALDH1A3 | -                                           | -                                 | -0.06394                               | -                                      | -                                | -                                      | -                        | -                          | -0.06394                                 | -                                   |
| ALDOA   | -                                           | -                                 | -0.1457                                | -                                      | -                                | -                                      | -0.1457                  | -                          | -                                        | -                                   |
| ALK     | -                                           | -                                 | -                                      | -                                      | -                                | -                                      | -                        | -                          | 0.05148                                  | -                                   |
| AMOTL2  | -0.03769                                    | -                                 | -                                      | -                                      | -                                | -                                      | -                        | -                          | -                                        | -                                   |
| ANGPT2  | -                                           | -                                 | -                                      | -                                      | -                                | -                                      | 0.04709                  | -                          | -                                        | -                                   |
| APC     | -                                           | -                                 | -                                      | -                                      | -                                | -                                      | -                        | -                          | 0.1869                                   | -                                   |
| AR      | -0.06652                                    | -                                 | -                                      | -                                      | -                                | -                                      | -                        | -                          | -0.06652                                 | -                                   |
| ARG1    | -                                           | 0.02409                           | -                                      | -                                      | -                                | -                                      | -                        | -                          | -                                        | -                                   |
| ARID1A  | -                                           | -                                 | -                                      | -                                      | -                                | -0.1399                                | -                        | -                          | -0.1399                                  | -                                   |
| ARID1B  | -                                           | -                                 | -                                      | -                                      | -                                | -0.003126                              | -                        | -                          | -                                        | -                                   |

|          |          |         |          |          |          |          |   |          |         |          |
|----------|----------|---------|----------|----------|----------|----------|---|----------|---------|----------|
| ARID2    | -        | -       | -        | -        | -        | -0.07319 | - | -        | -       | -        |
| ARID4A   | -        | -       | -        | -        | -        | 0.2553   | - | -        | -       | -        |
| ARID4B   | -        | -       | -        | -        | -        | 0.03478  | - | -        | -       | -        |
| ASH1L    | -        | -       | -        | -        | -        | 0.0374   | - | -        | -       | -        |
| ASXL2    | -        | -       | -        | -        | -        | -0.02925 | - | -        | -       | -        |
| ATF2     | -        | -       | 0.01954  | -        | -        | 0.01954  | - | -        | 0.01954 | -        |
| ATF4     | -        | -       | -        | -        | -        | 0.03731  | - | -        | 0.03731 | -        |
| ATF7IP   | -        | -       | -        | -        | -        | -0.1245  | - | -        | -       | -        |
| ATG101   | -        | -       | -0.238   | -        | -        | -        | - | -        | -       | -        |
| ATG2B    | -        | -       | 0.08743  | -        | -        | -        | - | -        | -       | -        |
| ATG4B    | -        | -       | 0.04174  | -        | -        | -        | - | -        | -       | -        |
| ATM      | -        | -       | -        | 0.09058  | -        | 0.09058  | - | -        | -       | -        |
| ATOX1    | -        | -       | -0.1337  | -        | -        | -        | - | -        | -       | -        |
| ATP7A    | -        | -       | -0.05686 | -        | -        | -        | - | -        | -       | -        |
| ATR      | -        | -       | -        | -        | -        | -0.109   | - | -        | -       | -        |
| ATRX     | -        | -       | -        | -        | -        | 0.1194   | - | -        | -       | -        |
| ATXN7    | -        | -       | -        | -        | -        | 0.0344   | - | -        | -       | -        |
| AURKA    | -0.17210 | -       | -0.17210 | -        | -0.17210 | -        | - | -        | -       | -        |
| AURKB    | -        | -       | -        | -        | -0.1897  | -        | - | -        | -       | -        |
| AXL      | 0.09935  | -       | -        | -        | -        | -        | - | -        | -       | -        |
| B2M      | -        | 0.02963 | -        | -        | -        | -        | - | -        | -       | 0.02963  |
| B4GALNT1 | -        | 0.09147 | -        | -        | -        | -        | - | -        | -       | -        |
| B4GALT1  | -        | -       | -        | -        | -        | -        | - | -        | -0.2492 | -        |
| BAD      | -        | -       | -        | -        | -        | -        | - | 0.007956 | -       | -        |
| BAX      | -        | -       | -        | -        | -        | -0.0731  | - | -0.0731  | -       | -        |
| BCAP31   | -        | -0.118  | -        | -        | -        | -        | - | -        | -       | -        |
| BCL2     | -        | -       | -        | 0.001467 | -        | -        | - | 0.001467 | -       | -        |
| BCL2A1   | -        | -       | -        | -        | -        | -0.09684 | - | -0.09684 | -       | -0.09684 |
| BCL2L1   | -        | -       | -        | -        | -        | -0.01535 | - | -0.01535 | -       | -0.01535 |
| BHLHE40  | -        | -       | -0.1036  | -        | -        | -        | - | -        | -0.1036 | -        |
| BIRC3    | -        | -       | -        | -        | -        | 0.04297  | - | -        | -       | 0.04297  |
| BIRC5    | -0.20210 | -       | -        | -        | -        | -        | - | -        | -       | -        |
| BLK      | -        | 0.05693 | -        | -        | -        | -        | - | -        | -       | -        |
| BLM      | -        | -       | -        | -        | -        | -0.08186 | - | -        | -       | -        |
| BMPRI1A  | -        | -       | -        | -        | -        | -        | - | -        | 0.1043  | -        |
| BMPR2    | -        | -       | -        | -        | -        | -        | - | -        | 0.1193  | -        |
| BRAF     | -        | -       | -        | -        | -        | -        | - | -        | -0.2096 | -        |
| BRCA1    | -        | -       | -        | -        | -        | -0.117   | - | -        | -0.117  | -        |
| BRCA2    | -        | -       | -        | -        | -        | -0.1006  | - | -        | -       | -        |

|        |          |           |           |          |            |            |         |         |            |           |
|--------|----------|-----------|-----------|----------|------------|------------|---------|---------|------------|-----------|
| BRIP1  | -        | -         | -         | -        | -0.1851    | -0.1851    | -       | -       | -          | -         |
| BRMS1  | -        | -         | -         | -        | -          | -0.177     | -       | -       | -          | -         |
| BTK    | -        | -         | -         | -        | -          | -          | -       | -       | 0.01493    | 0.01493   |
| BUB1   | -        | -         | -0.1995   | -        | -0.1995    | -          | -       | -       | -          | -         |
| BUB1B  | -        | -         | -         | -        | -0.2065    | -          | -       | -       | -          | -         |
| BYSL   | -        | -         | -         | -        | -          | -          | -       | -       | -0.2335    | -         |
| C3AR1  | -        | -         | -         | -        | -          | -          | -       | -       | -          | 0.04855   |
| CA9    | -        | -         | -         | -        | -          | -          | 0.00661 | -       | -          | -         |
| CACYBP | -        | -         | -0.09215  | -        | -          | -          | -       | -       | -0.09215   | -         |
| CALML3 | -        | -         | -         | -        | -          | -          | -       | -       | -0.2102    | -         |
| CARD11 | -        | 0.02141   | -         | -        | -          | -          | -       | -       | -          | 0.02141   |
| CASP3  | 0.00357  | -         | -         | -        | -          | -          | -       | 0.00357 | -          | -         |
| CAV1   | 0.00096  | -         | -         | -        | -          | -          | -       | -       | -          | -         |
| CBX2   | -        | -         | -         | -        | -          | -0.1919    | -       | -       | -          | -         |
| CCL13  | -        | -         | -         | -        | -          | -          | -       | -       | -          | -0.0303   |
| CCL19  | -        | -         | -         | -        | -          | -          | -       | -       | -          | 0.01663   |
| CCL2   | 0.03352  | -         | -         | -        | -          | -          | -       | -       | -          | 0.03352   |
| CCL21  | 0.09706  | -         | -         | -        | -          | -          | -       | -       | -          | 0.09706   |
| CCL4   | -        | -         | -         | -        | -          | -          | -       | -       | -          | 0.02689   |
| CCL5   | -        | -         | -         | -        | -          | -          | -       | -       | -          | -0.1156   |
| CCNA2  | -        | -         | -         | -0.1399  | -0.1399    | -          | -       | -       | -0.1399    | -         |
| CCNB1  | -        | -         | -         | -        | -0.2128    | -          | -       | -       | -          | -         |
| CCNB2  | -        | -         | -         | -        | -0.21      | -          | -       | -       | -          | -         |
| CCND1  | -        | -         | -         | -        | -0.02217   | -          | -       | -       | -          | -         |
| CCND2  | -        | -         | -         | -        | 0.2944     | -          | -       | -       | -          | -         |
| CCNE1  | -        | -         | -         | -0.146   | -0.146     | -          | -       | -       | -0.146     | -         |
| CCNE2  | -        | -         | -         | -0.07698 | -0.07698   | -          | -       | -       | -          | -         |
| CCNF   | -        | -         | -0.1962   | -        | -0.1962    | -          | -       | -       | -          | -         |
| CCNK   | -        | -         | -         | -        | -0.1374    | -0.1374    | -       | -       | -          | -         |
| CCNT1  | -        | -         | -         | -        | -0.0007515 | -0.0007515 | -       | -       | -0.0007515 | -         |
| CCR1   | -        | -         | -         | -        | -          | -          | -       | -       | -          | -0.005211 |
| CCR2   | -        | -         | -         | -        | -          | -          | -       | -       | -          | -0.02073  |
| CCR4   | -        | -         | -         | -        | -          | -          | -       | -       | -          | -0.001629 |
| CCR5   | -        | -         | -         | -        | -          | -          | -       | -       | -          | -0.05504  |
| CCR7   | -0.06209 | -         | -         | -        | -          | -          | -       | -       | -          | -0.06209  |
| CCS    | -        | -         | -0.006657 | -        | -          | -          | -       | -       | -          | -         |
| CD14   | -        | -         | -         | -        | -          | 0.008913   | -       | -       | -          | 0.008913  |
| CD163  | -        | -0.04781  | -         | -        | -          | -          | -       | -       | -          | -         |
| CD19   | -        | -0.003669 | -         | -        | -          | -          | -       | -       | -          | -         |

|        |          |            |         |          |          |          |   |          |          |         |          |
|--------|----------|------------|---------|----------|----------|----------|---|----------|----------|---------|----------|
| CD209  | -        | 0.0402     | -       | -        | -        | -        | - | -        | -        | -       | -        |
| CD22   | -        | -0.001831  | -       | -        | -        | -        | - | -        | -        | -       | -        |
| CD244  | -        | 0.01304    | -       | -        | -        | -        | - | -        | -        | -       | -        |
| CD247  | -        | -0.02316   | -       | -        | -        | -        | - | -        | -        | -       | -        |
| CD27   | -        | -0.04435   | -       | -        | -        | -        | - | -0.04435 | -        | -       | -        |
| CD274  | -0.07549 | -0.07549   | -       | -        | -        | -        | - | -        | -        | -       | -        |
| CD276  | -        | -0.246     | -       | -        | -        | -        | - | -        | -        | -       | -        |
| CD28   | -        | -0.0962    | -       | -        | -        | -        | - | -        | -        | -       | -        |
| CD300A | -        | -          | -       | -        | -        | -        | - | -        | -        | -       | 0.03178  |
| CD33   | -        | -          | -       | -        | -        | -        | - | -        | -        | -       | 0.02649  |
| CD34   | -        | -          | -       | 0.2309   | -        | -        | - | -        | -        | -       | -        |
| CD38   | -        | -0.0008862 | -       | -        | -        | -        | - | -        | -        | -       | -        |
| CD3D   | -        | -0.06696   | -       | -        | -        | -        | - | -        | -        | -       | -        |
| CD3E   | -        | -0.0776    | -       | -        | -        | -        | - | -        | -        | -       | -        |
| CD3G   | -        | -0.0441    | -       | -        | -        | -        | - | -        | -        | -       | -        |
| CD4    | -        | -0.02434   | -       | -        | -        | -        | - | -        | -        | -       | -        |
| CD40   | -        | -0.05459   | -       | -        | -        | -0.05459 | - | -        | -        | -       | -0.05459 |
| CD40LG | -        | 0.05196    | -       | -        | -        | -        | - | -        | -        | -       | 0.05196  |
| CD44   | -0.05629 | -0.05629   | -       | -0.05629 | -        | -        | - | -        | -        | -       | -0.05629 |
| CD47   | -0.03208 | -          | -       | -        | -        | -        | - | -        | -        | -       | -0.03208 |
| CD53   | -        | -          | -       | -        | -        | -        | - | -        | -        | -       | 0.02249  |
| CD6    | -        | -0.03955   | -       | -        | -        | -        | - | -        | -        | -       | -        |
| CD68   | -        | -          | -       | -        | -        | -        | - | -        | -        | -       | -0.05926 |
| CD80   | -        | -0.09567   | -       | -        | -        | -        | - | -        | -        | -       | -        |
| CD84   | -        | -0.001256  | -       | -        | -        | -        | - | -        | -        | -       | -        |
| CD86   | -        | -0.02289   | -       | -        | -        | -0.02289 | - | -        | -        | -       | -        |
| CD8A   | -        | -0.03925   | -       | -        | -        | -        | - | -        | -        | -       | -        |
| CD8B   | -        | -0.02905   | -       | -        | -        | -        | - | -        | -        | -       | -        |
| CDC20  | -0.21180 | -          | -       | -        | -0.21180 | -        | - | -        | -        | -       | -        |
| CDC25A | -        | -          | -0.1304 | -        | -0.1304  | -        | - | -        | -        | -       | -        |
| CDC25C | -        | -          | -       | -        | -0.151   | -        | - | -        | -        | -       | -        |
| CDCA5  | -        | -          | -       | -        | -0.1835  | -        | - | -        | -        | -       | -        |
| CDCA8  | -        | -          | -       | -        | -0.1904  | -        | - | -        | -        | -       | -        |
| CDCP1  | -        | -          | -       | -        | -        | -        | - | -        | -0.07795 | -       | -        |
| CDH1   | -0.12950 | -          | -       | -        | -        | -        | - | -        | -        | -       | -        |
| CDH11  | 0.11360  | -          | -       | -        | -        | -        | - | -        | -        | -       | -        |
| CDH5   | 0.23290  | -          | -       | -        | -        | -        | - | -        | -        | -       | -        |
| CDK1   | -        | -          | -       | -        | -0.1678  | -        | - | -        | -        | -0.1678 | -        |
| CDK12  | -        | -          | -       | -        | -        | -0.1402  | - | -        | -        | -       | -        |



|            |          |          |          |          |          |          |          |   |          |   |          |
|------------|----------|----------|----------|----------|----------|----------|----------|---|----------|---|----------|
| CTSW       | -        | -0.09058 | -        | -        | -        | -        | -        | - | -        | - | -        |
| CXCL10     | -        | -        | -        | -        | -        | -        | -        | - | -        | - | -0.1617  |
| CXCL11     | -        | -        | -        | -        | -        | -        | -        | - | -        | - | -0.07826 |
| CXCL9      | -        | -        | -        | -        | -        | -        | -        | - | -        | - | -0.1227  |
| CXCR2      | -        | -        | -        | -        | -        | -        | -        | - | -        | - | 0.09387  |
| CXCR4      | -0.04040 | -        | -0.04040 | -        | -        | -        | -        | - | -        | - | -0.04040 |
| CXCR6      | -        | -        | -        | -        | -        | -        | -        | - | -        | - | -0.06558 |
| CXXC5      | -        | -        | -        | -        | -        | -        | -        | - | 0.1316   | - | -        |
| CYBB       | -        | -        | 0.02732  | -        | -        | -        | -        | - | -        | - | 0.02732  |
| CYFIP1     | -        | -        | -        | -        | -        | -        | -        | - | -        | - | -0.1344  |
| CYP4A11/22 | -        | -        | 0.03954  | -        | -        | -        | -        | - | -        | - | -        |
| DCN        | 0.08491  | -        | -        | -        | -        | -        | -        | - | 0.08491  | - | -        |
| DICER1     | -        | -        | -        | -        | -        | 0.0149   | -        | - | -        | - | -        |
| DKC1       | -        | -        | -        | -0.1536  | -0.1536  | -        | -        | - | -        | - | -        |
| DLL3       | -        | -        | -        | -        | -        | -        | -        | - | -0.02917 | - | -        |
| DNA2       | -        | -        | -        | -0.09779 | -0.09779 | -0.09779 | -        | - | -        | - | -        |
| DNAJC14    | -        | -        | -        | -        | -        | -        | -        | - | -        | - | -        |
| DNMT1      | -0.17720 | -        | -        | -        | -        | -        | -        | - | -        | - | -        |
| DOCK1      | 0.05697  | -        | -        | -        | -        | -        | -        | - | -        | - | -        |
| DOCK2      | -        | -        | -        | -        | -        | -        | -        | - | -        | - | 0.01559  |
| DTL        | -        | -        | -        | -        | -        | -0.2146  | -        | - | -        | - | -        |
| DUSP6      | -        | -        | -        | -        | -        | -        | -        | - | 0.05735  | - | -        |
| E2F1       | -        | -        | -        | -0.1596  | -0.1596  | -        | -        | - | -        | - | -        |
| E2F2       | -        | -        | -        | -0.1658  | -0.1658  | -        | -        | - | -        | - | -        |
| EDN1       | -        | -        | -        | -        | -        | -        | 0.2543   | - | -        | - | -        |
| EGF        | 0.08977  | -        | -        | -        | -        | -        | -        | - | -0.08977 | - | -        |
| EGFR       | 0.09866  | -        | -        | -        | -        | -        | -        | - | 0.09866  | - | -        |
| EGLN3      | -        | -        | 0.04038  | -        | -        | -        | 0.04038  | - | -        | - | -        |
| EHHADH     | -        | -        | -0.0119  | -        | -        | -        | -        | - | -        | - | -        |
| EIF2AK3    | -        | -        | -0.06326 | -        | -        | -        | -        | - | -        | - | -        |
| EIF4EBP1   | -        | -        | -0.19    | -        | -        | -        | -        | - | -0.19    | - | -        |
| EIF4G1     | -        | -        | -0.3216  | -        | -        | -        | -        | - | -        | - | -0.3216  |
| ELOVL5     | -        | -        | -0.1252  | -        | -        | -        | -        | - | -0.1252  | - | -        |
| EME1       | -        | -        | -        | -        | -        | -0.2101  | -        | - | -        | - | -        |
| ENTPD1     | -        | 0.1994   | -        | -        | -        | -        | -        | - | -        | - | -        |
| ENTPD2     | -        | 0.1796   | -        | -        | -        | -        | -        | - | -        | - | -        |
| EOMES      | -        | -0.1231  | -        | -        | -        | -        | -        | - | -        | - | -        |
| EP300      | -        | -        | -        | -        | -        | -0.04429 | -0.04429 | - | -0.04429 | - | -        |
| EPAS1      | -        | -        | -        | 0.2205   | -        | -        | -        | - | -        | - | -        |

[illegible]

[illegible]



[illegible]

[illegible]



[illegible]

|        |          |         |           |          |         |          |         |         |           |          |
|--------|----------|---------|-----------|----------|---------|----------|---------|---------|-----------|----------|
| MAPK8  | -        | -       | -         | -        | -       | -        | -       | 0.04849 | 0.04849   | -        |
| MCL1   | -        | -       | -         | -        | -       | -        | -       | -       | -         | -0.03805 |
| MCM2   | -        | -       | -0.2922   | -        | -0.2922 | -        | -       | -       | -         | -        |
| MCM4   | -        | -       | -0.2089   | -        | -0.2089 | -        | -       | -       | -0.2089   | -        |
| MDM2   | -        | -       | -         | -0.1467  | -0.1467 | -0.1467  | -       | -       | -         | -        |
| MET    | -0.01353 | -       | -         | -        | -       | -        | -       | -       | -0.01353  | -        |
| MGA    | -        | -       | -         | -        | -       | -        | -       | -       | -0.1124   | -        |
| MKI67  | -        | -       | -         | -        | -0.1597 | -        | -       | -       | -         | -        |
| MLANA  | -        | -0.1479 | -         | -        | -       | -        | -       | -       | -         | -        |
| MLH1   | -        | -       | -         | -        | -       | -0.0823  | -       | -       | -         | -        |
| MLST8  | -        | -       | -0.08724  | -        | -       | -        | -       | -       | -         | -        |
| MMP9   | -0.18190 | -       | -         | -        | -       | -        | -       | -       | -         | -        |
| MNDA   | -        | -       | -         | -        | -       | -        | -       | -       | -         | 0.03368  |
| MRPL19 | -        | -       | -         | -        | -       | -        | -       | -       | -         | -        |
| MS4A1  | -        | 0.04733 | -         | -        | -       | -        | -       | -       | -         | -        |
| MS4A2  | -        | 0.1008  | -         | -        | -       | -        | -       | -       | -         | -        |
| MS4A4A | -        | 0.04486 | -         | -        | -       | -        | -       | -       | -         | -        |
| MSH2   | -        | -       | -         | -        | -       | -0.1898  | -       | -       | -         | -        |
| MSLN   | -        | 0.04268 | -         | -        | -       | -        | -       | -       | -         | -        |
| MST1R  | -        | 0.03704 | -         | -        | -       | -        | -       | -       | -         | -        |
| MTHFD2 | -        | -       | -0.08998  | -        | -       | -        | -       | -       | -         | -        |
| MTOR   | -0.20230 | -       | -0.20230  | -        | -       | -        | -       | -       | -         | -        |
| MUC1   | -0.05328 | -       | -         | -        | -       | -        | -       | -       | -         | -        |
| MUC16  | -        | -0.2043 | -         | -        | -       | -        | -       | -       | -         | -        |
| MX1    | -        | -       | -         | -        | -       | -        | -       | -       | -         | -0.1134  |
| MYB    | -        | -       | -         | -        | -       | -        | -       | -       | -0.006724 | -        |
| MYBL2  | -        | -       | -         | -        | -0.196  | -        | -       | -       | -         | -        |
| MYC    | -0.01342 | -       | -         | -0.01342 | -       | -0.01342 | -       | -       | -0.01342  | -        |
| MYD88  | -        | -       | -         | -        | -       | -        | -       | -       | -         | -0.08544 |
| MYL9   | 0.12700  | -       | -         | -        | -       | -        | -       | -       | -         | -        |
| NANOG  | -0.03054 | -       | -         | -0.03054 | -       | -        | -       | -       | -         | -        |
| NBL1   | -        | -       | -         | -        | -       | -        | -       | -       | 0.04256   | -        |
| NCAPG  | -        | -       | -         | -        | -0.1809 | -        | -       | -       | -         | -        |
| NCF1   | -        | -       | -0.03367  | -        | -       | -        | -       | -       | -         | -        |
| NCF2   | -        | -       | -0.05987  | -        | -       | -        | -       | -       | -         | -        |
| NCK1   | -        | -0.1103 | -         | -        | -       | -        | -0.1103 | -       | -         | -        |
| NCOA2  | -        | -       | -0.006575 | -        | -       | -        | -       | -       | -0.006575 | -        |
| NCOR1  | -        | -       | 0.06341   | -        | -       | 0.06341  | -       | -       | 0.06341   | -        |
| NCR1   | -        | -0.0385 | -         | -        | -       | -        | -       | -       | -         | -        |

|        |          |          |          |          |         |          |          |   |          |           |
|--------|----------|----------|----------|----------|---------|----------|----------|---|----------|-----------|
| NDUFA2 | -        | -        | 0.007326 | -        | -       | -        | -        | - | -        | -         |
| NDUFB1 | -        | -        | 0.0266   | -        | -       | -        | -        | - | -        | -         |
| NEIL3  | -        | -        | -        | -        | -       | -0.1791  | -        | - | -        | -         |
| NEK2   | -        | -        | -        | -        | -0.1783 | -        | -        | - | -        | -         |
| NF1    | -        | -        | -        | -        | -       | -        | -        | - | 0.06864  | -         |
| NFAM1  | -        | -        | -        | -        | -       | -        | -        | - | -        | 0.0209    |
| NFATC2 | -        | 0.07985  | -        | -        | -       | -        | -        | - | -        | -         |
| NFE2L2 | -        | -        | -0.0637  | -        | -       | -        | -        | - | -        | -         |
| NFKB1  | -0.09383 | -        | -        | -0.09383 | -       | -        | -        | - | -        | -0.09383  |
| NFKB2  | -        | -        | -        | -        | -       | -        | -        | - | -        | -0.1864   |
| NKG7   | -        | -0.06863 | -        | -        | -       | -        | -        | - | -        | -         |
| NKX3-1 | -        | -        | -        | -        | -       | -        | -        | - | -0.129   | -         |
| NME1   | -        | -        | -        | -        | -       | -        | -        | - | -0.1972  | -         |
| NOS2   | -        | 0.3611   | -        | -        | -       | -        | 0.3611   | - | -        | 0.3611    |
| NOS3   | -        | -        | -        | -        | -       | -        | 0.2365   | - | 0.2365   | -         |
| NOTCH3 | -        | -        | -        | -        | -       | -        | -        | - | -0.08621 | -         |
| NRAS   | -        | -        | -        | -        | -       | -        | -0.09475 | - | -0.09475 | -         |
| NRDE2  | -        | -        | -        | -        | -       | -        | -        | - | -        | -         |
| NSD1   | -        | -        | -        | -        | -       | -0.1091  | -        | - | -        | -         |
| NT5E   | -        | 0.2384   | -        | -        | -       | -        | -        | - | -        | -         |
| NUDT2  | -        | -        | 0.03725  | -        | -       | -        | -        | - | -        | -         |
| NUF2   | -        | -        | -        | -        | -0.1448 | -        | -        | - | -        | -         |
| OAS1   | -        | -        | -        | -        | -       | -        | -        | - | -        | -0.005844 |
| OAS2   | -        | -        | -        | -        | -       | -        | -        | - | -        | -0.1553   |
| OAS3   | -        | -        | -        | -        | -       | -        | -        | - | -        | -0.1146   |
| OAZ1   | -        | -        | -        | -        | -       | -        | -        | - | -        | -         |
| OSM    | -        | -        | -        | -        | -       | -        | -        | - | -        | 0.01809   |
| OSMR   | -        | -        | -        | -        | -       | -        | -        | - | -        | -0.1545   |
| P4HA2  | -        | -        | -        | -        | -       | -        | -0.07208 | - | -        | -         |
| P4HB   | -        | -        | -0.2358  | -        | -       | -        | -        | - | -0.2358  | -         |
| PA2G4  | -        | -        | -        | -        | -       | -        | -        | - | -0.1461  | -0.1461   |
| PAK2   | -0.15510 | -0.15510 | -        | -        | -       | -        | -        | - | -0.15510 | -         |
| PARD3  | -0.13740 | -        | -        | -        | -       | -        | -        | - | -        | -         |
| PARP1  | -        | -        | -        | -        | -       | -0.2477  | -        | - | -        | -0.2477   |
| PARP2  | -        | -        | -        | -        | -       | -0.06316 | -        | - | -        | -         |
| PARP3  | -        | -        | -        | -        | -       | 0.06725  | -        | - | -        | -         |
| PARVA  | 0.04004  | -        | -        | -        | -       | -        | -        | - | -        | -         |
| PBRM1  | -        | -        | -        | -        | -       | -0.02638 | -        | - | -        | -         |
| PCLAF  | -        | -        | -        | -        | -       | -0.1976  | -        | - | -        | -         |

|          |          |          |          |         |         |         |          |         |          |          |
|----------|----------|----------|----------|---------|---------|---------|----------|---------|----------|----------|
| PCNA     | -        | -        | -        | -0.1861 | -0.1861 | -0.1861 | -        | -       | -        | -        |
| PDCD1    | -        | -0.0824  | -        | -       | -       | -       | -        | -       | -        | -        |
| PDCD1LG2 | -        | -0.07065 | -        | -       | -       | -       | -        | -       | -        | -        |
| PDGFB    | -        | -        | -        | -       | -       | -       | 0.1242   | -       | 0.1242   | -        |
| PDGFRA   | -        | -        | -        | -       | -       | -       | 0.1989   | -       | 0.1989   | -        |
| PDGFRB   | -        | -        | -        | -       | -       | -       | 0.1772   | -       | 0.1772   | -        |
| PDK1     | -        | -        | -0.0913  | -       | -       | -       | -0.0913  | -       | -        | -        |
| PDLIM5   | -        | -        | -        | -       | -       | -       | -        | -       | 0.0908   | -        |
| PDPK1    | 0.15430  | -        | -        | -       | -       | -       | -        | -       | -        | -        |
| PFKFB3   | -        | -        | 0.002074 | -       | -       | -       | 0.002074 | -       | -        | -        |
| PFKP     | -        | -        | 0.04565  | -       | -       | -       | 0.04565  | -       | -        | -        |
| PGF      | 0.08108  | -        | -        | -       | -       | -       | -        | -       | -        | -        |
| PGK1     | -        | -        | -0.1515  | -       | -       | -       | -0.1515  | -       | -        | -        |
| PHB      | -        | -        | -        | -       | -       | -       | -        | -       | -0.1245  | -        |
| PIK3CA   | -0.11500 | -        | -        | -       | -       | -       | -0.11500 | -       | -0.11500 | -        |
| PIK3CB   | -        | -        | -        | -       | -       | -       | -0.02276 | -       | -0.02276 | -        |
| PIK3CD   | -        | -        | -        | -       | -       | -       | -        | -       | -0.151   | -        |
| PIK3R1   | -        | -        | -        | -       | -       | -       | 0.1788   | -       | 0.1788   | -        |
| PIK3R2   | -        | -        | -        | -       | -       | -       | -0.09264 | -       | -0.09264 | -        |
| PIK3R3   | -        | -        | -        | -       | -       | -       | -        | -       | -0.08601 | -        |
| PIK3R4   | -        | -        | -0.1841  | -       | -       | -       | -        | -       | -0.1841  | -        |
| PIK3R5   | -        | -        | -        | -       | -       | -       | -        | -       | 0.02775  | -        |
| PKM      | -        | -        | -0.1854  | -       | -       | -       | -0.1854  | -       | -        | -0.1854  |
| PLA2G4A  | -        | -        | -        | -       | -       | -       | -0.01827 | -       | -        | -        |
| PLAU     | -        | -        | -        | -       | -       | -       | -        | -       | -        | -0.1445  |
| PLCB3    | -        | -        | -        | -       | -       | -       | -        | -       | 0.07426  | -        |
| PLCG2    | -        | -        | -        | -       | -       | -       | -0.03938 | -       | -        | -0.03938 |
| PLEK2    | -        | -        | -        | -       | -       | -       | -        | -       | -0.01323 | -        |
| PLK1     | -        | -        | -0.1656  | -       | -0.1656 | -       | -        | -       | -0.1656  | -        |
| PMAIP1   | -        | -        | -        | -       | -       | -0.1381 | -        | -0.1381 | -        | -        |
| PNOC     | -        | -        | -        | -       | -       | -       | -        | -       | -        | -        |
| POLE     | -        | -        | -        | -0.205  | -0.205  | -0.205  | -        | -       | -        | -        |
| POLR2A   | -        | -        | -        | -       | -       | -       | -        | -       | -        | -        |
| POU5F1   | 0.03511  | -        | -        | 0.03511 | -       | -       | -        | -       | -        | -        |
| PPAN     | -        | -        | -        | -       | -       | -       | -        | -       | -0.1088  | -        |
| PRDX1    | -        | -        | -0.2119  | -       | -       | -       | -        | -       | -        | -        |
| PRDX2    | -        | -        | 0.05405  | -       | -       | -       | -        | -       | -        | -        |
| PRDX6    | -        | -        | -0.1985  | -       | -       | -       | -        | -       | -        | -        |
| PRF1     | -        | -0.04776 | -        | -       | -       | -       | -        | -       | -        | -        |

|          |          |          |          |          |          |         |         |   |          |          |
|----------|----------|----------|----------|----------|----------|---------|---------|---|----------|----------|
| PRIM1    | -        | -        | -        | -0.129   | -0.129   | -       | -       | - | -        | -        |
| PRKACA   | -        | -        | -0.04463 | -        | -        | -       | -       | - | -0.04463 | -        |
| PRKCA    | -        | -        | -        | -        | -        | -       | -       | - | 0.2754   | -        |
| PRKCB    | -        | -        | -        | -        | -        | -       | 0.1854  | - | -        | 0.1854   |
| PSMB10   | -        | 0.04513  | -        | -        | -        | -       | -       | - | 0.04513  | 0.04513  |
| PSMB7    | -        | -0.1707  | -        | -        | -        | -       | -       | - | -0.1707  | -        |
| PSMB9    | -        | -0.01081 | -        | -        | -        | -       | -       | - | -0.01081 | -0.01081 |
| PSMC4    | -        | -        | -        | -        | -        | -       | -       | - | -        | -        |
| PTCH1    | -        | -        | -        | -        | -        | -       | -       | - | 0.3031   | -        |
| PTCH2    | -        | -        | -        | -        | -        | -       | -       | - | 0.2463   | -        |
| PTEN     | 0.10210  | -        | -        | -        | -        | -       | -       | - | 0.10210  | -        |
| PTGER1   | -        | -        | -        | -        | -        | -       | -       | - | -        | 0.1001   |
| PTGER2   | -        | -        | -        | -        | -        | -       | -       | - | -        | 0.08781  |
| PTGER3   | -        | -        | -        | -        | -        | -       | -       | - | -        | 0.1984   |
| PTGER4   | -        | -        | -        | -        | -        | -       | -       | - | -        | 0.1639   |
| PTGS2    | 0.07788  | 0.07788  | -        | -        | -        | -       | -       | - | 0.07788  | 0.07788  |
| PTPN6    | -        | -0.09491 | -        | -        | -        | -       | -       | - | -        | -0.09491 |
| PTPRC    | -        | 0.02923  | -        | -        | -        | -       | -       | - | -        | -        |
| PUM1     | -        | -        | -        | -        | -        | -       | -       | - | -        | -        |
| RAC3     | -0.23690 | -        | -        | -        | -        | -       | -       | - | -0.23690 | -        |
| RAD51    | -        | -        | -        | -        | -0.2012  | -0.2012 | -       | - | -        | -        |
| RAD51AP1 | -        | -        | -        | -        | -        | -0.1615 | -       | - | -        | -        |
| RAD54B   | -        | -        | -        | -        | -        | -0.1775 | -       | - | -        | -        |
| RAD54L   | -        | -        | -        | -        | -        | -0.1904 | -       | - | -        | -        |
| RAF1     | -0.11620 | -        | -        | -        | -        | -       | -       | - | -0.11620 | -0.11620 |
| RASA1    | -        | -        | -        | -        | -        | -       | 0.1021  | - | 0.1021   | -        |
| RB1      | -        | -        | -        | 0.09071  | 0.09071  | -       | -       | - | 0.09071  | -        |
| RB1CC1   | -        | -        | 0.03161  | -        | -        | -       | -       | - | -        | -        |
| RBBP5    | -        | -        | -        | -        | -        | -0.1207 | -       | - | -0.1207  | -        |
| RBL1     | -        | -        | -        | -        | -0.103   | -       | -       | - | -0.103   | -        |
| RBX1     | -        | -        | -        | -        | -0.1218  | -       | -0.1218 | - | -0.1218  | -        |
| REL      | -        | -        | -        | -        | -        | -       | -       | - | -        | -0.07882 |
| RELB     | -        | -        | -        | -        | -        | -       | -       | - | -        | -0.134   |
| RET      | -        | -        | -        | -        | -        | -       | -       | - | 0.116    | -        |
| RFC2     | -        | -        | -        | -0.2753  | -0.2753  | -       | -       | - | -        | -        |
| RFC3     | -        | -        | -        | -0.06226 | -0.06226 | -       | -       | - | -        | -        |
| RFC4     | -        | -        | -        | -0.2274  | -0.2274  | -       | -       | - | -        | -        |
| RICTOR   | -        | -        | 0.08878  | -        | -        | -       | -       | - | -        | -        |
| RIMKLB   | -        | -        | -0.1234  | -        | -        | -       | -       | - | -        | -        |



[illegible]

|          |          |          |           |          |         |           |           |   |           |          |
|----------|----------|----------|-----------|----------|---------|-----------|-----------|---|-----------|----------|
| SNAI1    | 0.11680  | -        | -         | -        | -       | -         | -         | - | -         | -        |
| SNAI2    | -0.15740 | -        | -         | -        | -       | -         | -         | - | -         | -        |
| SOCS1    | -        | -        | -         | -        | -       | -         | -         | - | -         | -0.07398 |
| SOCS3    | -        | -        | -         | -        | -       | -         | -         | - | -         | -0.04366 |
| SOD1     | -        | -        | -0.002858 | -        | -       | -0.002858 | -         | - | -         | -        |
| SORD     | -        | -        | -0.07059  | -        | -       | -         | -         | - | -0.07059  | -        |
| SOS1     | -        | -        | -         | -        | -       | -         | 0.0008924 | - | 0.0008924 | -        |
| SOX2     | -0.00559 | -        | -         | -0.00559 | -       | -         | -         | - | -         | -        |
| SOX7     | -        | -        | -         | -        | -       | -         | -         | - | 0.09488   | -        |
| SPDEF    | -        | -        | -         | -        | -       | -         | -         | - | -0.003232 | -        |
| SPHK2    | -        | -        | -         | -        | -       | -         | 0.139     | - | -         | -        |
| SPIB     | -        | 0.01806  | -         | -        | -       | -         | -         | - | -         | -        |
| SPINT1   | -        | -        | -         | -        | -       | -0.1668   | -         | - | -0.1668   | -        |
| SPINT2   | -        | -        | -         | -        | -       | -         | -         | - | -0.02861  | -        |
| SQLE     | -        | -        | -0.08493  | -        | -       | -         | -         | - | -         | -        |
| SQSTM1   | -        | -        | -0.05427  | -        | -       | -         | -         | - | -         | -0.05427 |
| SRC      | 0.02867  | -        | -         | -        | -       | -         | 0.02867   | - | 0.02867   | -        |
| SREBF1   | -        | -        | -0.163    | -        | -       | -         | -         | - | -         | -        |
| SRM      | -        | -        | -         | -        | -       | -         | -         | - | -0.1731   | -        |
| SSRP1    | -        | -        | -         | -        | -       | -0.1934   | -         | - | -         | -        |
| STAG2    | -        | -        | -         | -        | 0.04348 | -         | -         | - | 0.04348   | -        |
| STAT1    | -        | -        | -         | -        | -       | -         | -0.1918   | - | -         | -0.1918  |
| STAT3    | -0.12590 | -        | -         | -0.12590 | -       | -         | -0.12590  | - | -0.12590  | -0.12590 |
| STAT4    | -        | -        | -         | -        | -       | -         | -         | - | -         | 0.1331   |
| STING1   | -        | -        | -         | -        | -       | -         | -         | - | -         | -0.02711 |
| STIP1    | -        | -        | -0.2523   | -        | -       | -         | -         | - | -         | -        |
| STK11IP  | -        | -        | -         | -        | -       | -         | -         | - | -         | -        |
| STK3     | -0.26360 | -        | -         | -        | -       | -         | -         | - | -         | -        |
| STK4     | 0.07915  | -        | -         | -        | -       | -         | -         | - | -         | -        |
| SUPT16H  | -        | -        | -         | -        | -       | -0.1669   | -         | - | -         | -        |
| SYK      | -        | -        | -         | -        | -       | -         | -         | - | -         | 0.02158  |
| TAP1     | -        | -0.08267 | -         | -        | -       | -         | -         | - | -         | -        |
| TAP2     | -        | -0.06996 | -         | -        | -       | -         | -         | - | -         | -        |
| TAPBP    | -        | -0.1206  | -         | -        | -       | -         | -         | - | -         | -        |
| TAZ      | 0.08180  | -        | -         | -        | -       | -         | -         | - | -         | -        |
| TBC1D10B | -        | -        | -         | -        | -       | -         | -         | - | -         | -        |
| TBP      | -        | -        | -         | -        | -       | -         | -         | - | -         | -        |
| TBRG4    | -        | -        | -         | -        | -       | -         | -         | - | -0.1066   | -        |
| TBX21    | -        | -0.03826 | -         | -        | -       | -         | -         | - | -         | -        |

|          |          |          |   |          |          |         |          |           |          |           |
|----------|----------|----------|---|----------|----------|---------|----------|-----------|----------|-----------|
| TCF7     | -        | 0.05583  | - | -        | -        | -       | -        | -         | 0.05583  | -         |
| TCL1A    | -        | -        | - | -        | -        | -       | -        | -         | -        | -         |
| TCOF1    | -        | -        | - | -        | -        | -       | -        | -         | -0.1559  | -         |
| TEAD1    | 0.10630  | -        | - | -        | -        | -       | -        | -         | -        | -         |
| TEAD2    | -0.20250 | -        | - | -        | -        | -       | -        | -         | -        | -         |
| TEK      | -        | -        | - | -        | -        | -       | 0.3113   | -         | 0.3113   | -         |
| TERF2IP  | -        | -        | - | 0.1814   | -        | -       | -        | -         | -        | -         |
| TERT     | -        | -        | - | -0.07316 | -        | -       | -        | -         | -0.07316 | -         |
| TET2     | -        | -        | - | -        | -        | 0.0562  | -        | -         | -        | -         |
| TFDP1    | -        | -        | - | -        | -0.01976 | -       | -        | -         | -0.01976 | -         |
| TFRC     | -        | -        | - | -        | -        | -       | -        | -         | -        | -         |
| TGFB1    | -0.03240 | -        | - | -        | -        | -       | -        | -         | -0.03240 | -         |
| TGFB2    | 0.04346  | -        | - | -        | -        | -       | -        | -         | 0.04346  | -         |
| TGFB3    | -0.01319 | -        | - | -        | -        | -       | -0.01319 | -         | -0.01319 | -         |
| TGFBR2   | -        | -        | - | -        | -        | -       | -        | -         | 0.1999   | -         |
| TGM2     | 0.09536  | -        | - | -        | -        | -       | -        | -         | -        | -         |
| THBS1    | 0.01588  | -        | - | -        | -        | -       | 0.01588  | -         | 0.01588  | -         |
| THBS2    | 0.02482  | -        | - | -        | -        | -       | 0.02482  | -         | -        | -         |
| TIGIT    | -        | -0.08863 | - | -        | -        | -       | -        | -         | -        | -         |
| TIMELESS | -        | -        | - | -        | -        | -0.3036 | -        | -         | -        | -         |
| TJP1     | 0.08539  | -        | - | -        | -        | -       | -        | -         | -        | -         |
| TLK2     | -        | -        | - | -        | -        | -       | -        | -         | -        | -         |
| TLR3     | -        | -        | - | -        | -        | -       | -        | -         | -        | 0.07679   |
| TLR4     | 0.27060  | -        | - | -        | -        | -       | -        | -         | -        | 0.27060   |
| TMPRSS2  | -        | -        | - | -        | -        | 0.08203 | -        | -         | 0.08203  | -         |
| TMUB2    | -        | -        | - | -        | -        | -       | -        | -         | -        | -         |
| TNF      | -0.02426 | -0.02426 | - | -        | -        | -       | -        | -0.02426  | -        | -0.02426  |
| TNFAIP3  | -        | -        | - | -        | -        | -       | -        | -         | -        | -0.006543 |
| TNFRSF17 | -        | -        | - | -        | -        | -       | -        | 0.007952  | -        | -         |
| TNFRSF18 | -        | -0.1709  | - | -        | -        | -       | -        | -0.1709   | -        | -         |
| TNFRSF4  | -        | 0.003598 | - | -        | -        | -       | -        | 0.003598  | -        | -         |
| TNFRSF9  | -        | -0.116   | - | -        | -        | -       | -        | -0.116    | -        | -         |
| TNFSF11  | -        | -        | - | -        | -        | -       | -        | 0.0868    | -        | 0.0868    |
| TNFSF13B | -        | -        | - | -        | -        | -       | -        | -0.004895 | -        | -0.004895 |
| TNFSF14  | -        | -        | - | -        | -        | -       | -        | 0.02908   | -        | 0.02908   |
| TNFSF8   | -        | -        | - | -        | -        | -       | -        | 0.01987   | -        | -         |
| TNS1     | 0.19410  | -        | - | -        | -        | -       | -        | -         | -        | -         |
| TNS4     | -        | -        | - | -        | -        | -       | -        | -         | -0.04117 | -         |
| TOP2A    | -0.17920 | -        | - | -        | -0.17920 | -       | -        | -         | -        | -         |



|        |          |           |         |   |   |         |   |   |   |           |
|--------|----------|-----------|---------|---|---|---------|---|---|---|-----------|
| XBP1   | -        | -         | -0.1373 | - | - | -       | - | - | - | -         |
| XCL1/2 | -        | -         | -       | - | - | -       | - | - | - | -0.16     |
| XRCC2  | -        | -         | -       | - | - | -0.1656 | - | - | - | -         |
| YAP1   | -0.08568 | -         | -       | - | - | -       | - | - | - | -         |
| ZAP70  | -        | -0.006188 | -       | - | - | -       | - | - | - | -0.006188 |
| ZEB1   | 0.36210  | -         | -       | - | - | 0.36210 | - | - | - | -         |
| ZMYM2  | -        | -         | -       | - | - | 0.08469 | - | - | - | -         |

**Supplemental Table 2. TCGA tumor histologies and abbreviations by germ Layer. 31**

histologies included in the analysis (n=10,616).

| Study Abbreviation | Study Name                                                       | Layer    |
|--------------------|------------------------------------------------------------------|----------|
| HNSC               | Head and Neck squamous cell carcinoma                            | Ectoderm |
| LUSC               | Lung squamous cell carcinoma                                     | Ectoderm |
| BRCA               | Breast invasive carcinoma                                        | Ectoderm |
| LGG                | Brain Lower Grade Glioma                                         | Ectoderm |
| GBM                | Glioblastoma multiforme                                          | Ectoderm |
| SKCM               | Skin Cutaneous Melanoma                                          | Ectoderm |
| READ               | Rectum adenocarcinoma                                            | Ectoderm |
| CESC               | Cervical squamous cell carcinoma and endocervical adenocarcinoma | Ectoderm |
| UVM                | Uveal Melanoma                                                   | Ectoderm |
| LUAD               | Lung adenocarcinoma                                              | Endoderm |
| STAD               | Stomach adenocarcinoma                                           | Endoderm |
| THYM               | Thymoma                                                          | Endoderm |
| THCA               | Thyroid carcinoma                                                | Endoderm |
| COAD               | Colon adenocarcinoma                                             | Endoderm |
| ESCA               | Esophageal carcinoma                                             | Endoderm |
| BLCA               | Bladder Urothelial Carcinoma                                     | Endoderm |
| PRAD               | Prostate adenocarcinoma                                          | Endoderm |
| UCEC               | Uterine Corpus Endometrial Carcinoma                             | Endoderm |
| CHOL               | Cholangiocarcinoma                                               | Endoderm |
| LIHC               | Liver hepatocellular carcinoma                                   | Endoderm |
| PAAD               | Pancreatic adenocarcinoma                                        | Endoderm |
| MESO               | Mesothelioma                                                     | Mesoderm |
| SARC               | Sarcoma                                                          | Mesoderm |
| UCS                | Uterine Carcinosarcoma                                           | Mesoderm |
| ACC                | Adrenocortical carcinoma                                         | Mesoderm |
| KICH               | Kidney Chromophobe                                               | Mesoderm |
| KIRC               | Kidney renal clear cell carcinoma                                | Mesoderm |
| KIRP               | Kidney renal papillary cell carcinoma                            | Mesoderm |
| OV                 | Ovarian serous cystadenocarcinoma                                | Mesoderm |
| TGCT               | Testicular Germ Cell Tumors                                      | Mesoderm |
| DLBC               | Lymphoid Neoplasm Diffuse Large B-cell Lymphoma                  | Mesoderm |

**Supplemental Table 3. Gene set analysis data for VIP and ZEB1:** Raw data including false discovery rate and pathway activity score differences VIP and ZEB1 gene expression in colon, esophageal, gastric, and pancreatic cancers performed using the Cancer Gene Set Analysis web-based tool.

| cancertype | symbol | pathway    | fdr         | class      | diff         | entrez |
|------------|--------|------------|-------------|------------|--------------|--------|
| COAD       | VIP    | EMT        | 0.041124418 | Activation | 1.015801808  | 7432   |
| COAD       | VIP    | CellCycle  | 0.005431145 | Inhibition | -0.750036032 | 7432   |
| COAD       | VIP    | Apoptosis  | 0.198534273 | None       | -0.490376809 | 7432   |
| COAD       | VIP    | DNADamage  | 0.489641781 | None       | -0.15228658  | 7432   |
| COAD       | VIP    | Hormone AR | 0.489641781 | None       | 0.13483567   | 7432   |
| COAD       | VIP    | Hormone ER | 0.489641781 | None       | 0.111521885  | 7432   |
| COAD       | VIP    | PI3KAKT    | 0.489641781 | None       | 0.298342695  | 7432   |
| COAD       | VIP    | RASMAPK    | 0.902484051 | None       | 0.047375737  | 7432   |
| COAD       | VIP    | RTK        | 0.728515276 | None       | 0.102467227  | 7432   |
| COAD       | VIP    | TSCmTOR    | 0.902484051 | None       | -0.023567346 | 7432   |
| COAD       | ZEB1   | EMT        | 6.7086E-07  | Activation | 2.029548788  | 6935   |
| COAD       | ZEB1   | Apoptosis  | 0.00020995  | Inhibition | -1.025632652 | 6935   |
| COAD       | ZEB1   | CellCycle  | 0.000023439 | Inhibition | -0.978292956 | 6935   |
| COAD       | ZEB1   | DNADamage  | 0.068893755 | None       | -0.337543044 | 6935   |
| COAD       | ZEB1   | Hormone AR | 0.630411032 | None       | -0.080228178 | 6935   |
| COAD       | ZEB1   | Hormone ER | 0.068893755 | None       | 0.213693968  | 6935   |
| COAD       | ZEB1   | PI3KAKT    | 0.131204654 | None       | 0.509012951  | 6935   |
| COAD       | ZEB1   | RASMAPK    | 0.33657796  | None       | 0.357846588  | 6935   |
| COAD       | ZEB1   | RTK        | 0.093747687 | None       | 0.355100765  | 6935   |
| COAD       | ZEB1   | TSCmTOR    | 0.884069769 | None       | -0.02809347  | 6935   |
| ESCA       | VIP    | Apoptosis  | 0.568623536 | None       | -0.246119895 | 7432   |
| ESCA       | VIP    | CellCycle  | 0.243620801 | None       | -0.478107651 | 7432   |
| ESCA       | VIP    | DNADamage  | 0.676039627 | None       | 0.198821452  | 7432   |
| ESCA       | VIP    | EMT        | 0.676039627 | None       | -0.32010165  | 7432   |
| ESCA       | VIP    | Hormone AR | 0.243620801 | None       | 0.525147792  | 7432   |
| ESCA       | VIP    | Hormone ER | 0.73570063  | None       | 0.040945327  | 7432   |
| ESCA       | VIP    | PI3KAKT    | 0.568623536 | None       | 0.30771803   | 7432   |
| ESCA       | VIP    | RASMAPK    | 0.73570063  | None       | 0.09607627   | 7432   |
| ESCA       | VIP    | RTK        | 0.676039627 | None       | 0.302798281  | 7432   |
| ESCA       | VIP    | TSCmTOR    | 0.267783533 | None       | -0.410803849 | 7432   |
| ESCA       | ZEB1   | CellCycle  | 0.016635416 | Inhibition | -0.685771683 | 6935   |
| ESCA       | ZEB1   | Apoptosis  | 0.220300049 | None       | -0.367110716 | 6935   |
| ESCA       | ZEB1   | DNADamage  | 0.900483421 | None       | 0.063481325  | 6935   |
| ESCA       | ZEB1   | EMT        | 0.108255466 | None       | 1.050990534  | 6935   |
| ESCA       | ZEB1   | Hormone AR | 0.799326743 | None       | -0.157139211 | 6935   |
| ESCA       | ZEB1   | Hormone ER | 0.76083447  | None       | 0.089393516  | 6935   |
| ESCA       | ZEB1   | PI3KAKT    | 0.220300049 | None       | 0.453095586  | 6935   |
| ESCA       | ZEB1   | RASMAPK    | 0.900483421 | None       | 0.031278487  | 6935   |
| ESCA       | ZEB1   | RTK        | 0.108255466 | None       | -0.800094109 | 6935   |
| ESCA       | ZEB1   | TSCmTOR    | 0.900483421 | None       | 0.066770235  | 6935   |
| PAAD       | VIP    | Apoptosis  | 0.783698173 | None       | -0.273138534 | 7432   |
| PAAD       | VIP    | CellCycle  | 0.783698173 | None       | -0.183215654 | 7432   |
| PAAD       | VIP    | DNADamage  | 0.783698173 | None       | 0.161417247  | 7432   |
| PAAD       | VIP    | EMT        | 0.783698173 | None       | -0.302568373 | 7432   |
| PAAD       | VIP    | Hormone AR | 0.783698173 | None       | 0.14380997   | 7432   |
| PAAD       | VIP    | Hormone ER | 0.783698173 | None       | 0.073908764  | 7432   |
| PAAD       | VIP    | PI3KAKT    | 0.783698173 | None       | 0.638949576  | 7432   |
| PAAD       | VIP    | RASMAPK    | 0.943444522 | None       | 0.017980714  | 7432   |
| PAAD       | VIP    | RTK        | 0.783698173 | None       | 0.213601021  | 7432   |
| PAAD       | VIP    | TSCmTOR    | 0.783698173 | None       | 0.298967536  | 7432   |
| PAAD       | ZEB1   | Apoptosis  | 0.767948305 | None       | 0.229699318  | 6935   |
| PAAD       | ZEB1   | CellCycle  | 0.668681179 | None       | -0.262953482 | 6935   |
| PAAD       | ZEB1   | DNADamage  | 0.933262588 | None       | -0.106771081 | 6935   |
| PAAD       | ZEB1   | EMT        | 0.159984197 | None       | 1.209519903  | 6935   |
| PAAD       | ZEB1   | Hormone AR | 0.933262588 | None       | -0.077218577 | 6935   |
| PAAD       | ZEB1   | Hormone ER | 0.668681179 | None       | 0.165702829  | 6935   |
| PAAD       | ZEB1   | PI3KAKT    | 0.979001915 | None       | 0.010255007  | 6935   |
| PAAD       | ZEB1   | RASMAPK    | 0.668681179 | None       | 0.264022384  | 6935   |
| PAAD       | ZEB1   | RTK        | 0.321866219 | None       | 0.482193088  | 6935   |
| PAAD       | ZEB1   | TSCmTOR    | 0.933262588 | None       | -0.059628799 | 6935   |
| STAD       | VIP    | EMT        | 1.95166E-10 | Activation | 1.769543577  | 7432   |
| STAD       | VIP    | PI3KAKT    | 0.010674536 | Activation | 0.64595023   | 7432   |
| STAD       | VIP    | RASMAPK    | 0.007757894 | Activation | 0.550921412  | 7432   |
| STAD       | VIP    | Apoptosis  | 0.004393318 | Inhibition | -0.700193804 | 7432   |
| STAD       | VIP    | CellCycle  | 0.000301407 | Inhibition | -0.832568902 | 7432   |
| STAD       | VIP    | DNADamage  | 0.389492026 | None       | -0.202436184 | 7432   |
| STAD       | VIP    | Hormone AR | 0.631558732 | None       | -0.096431926 | 7432   |
| STAD       | VIP    | Hormone ER | 0.06290419  | None       | 0.13455976   | 7432   |
| STAD       | VIP    | RTK        | 0.411419619 | None       | 0.20181335   | 7432   |
| STAD       | VIP    | TSCmTOR    | 0.389492026 | None       | 0.196849044  | 7432   |
| STAD       | ZEB1   | EMT        | 1.74046E-15 | Activation | 2.142423153  | 6935   |
| STAD       | ZEB1   | Hormone ER | 0.015774055 | Activation | 0.177402917  | 6935   |
| STAD       | ZEB1   | Apoptosis  | 4.75551E-06 | Inhibition | -1.043805273 | 6935   |
| STAD       | ZEB1   | CellCycle  | 6.61062E-07 | Inhibition | -1.087144241 | 6935   |
| STAD       | ZEB1   | RTK        | 0.023233584 | Inhibition | -0.573874408 | 6935   |
| STAD       | ZEB1   | DNADamage  | 0.754802545 | None       | 0.103483125  | 6935   |
| STAD       | ZEB1   | Hormone AR | 0.839497398 | None       | -0.062577629 | 6935   |
| STAD       | ZEB1   | PI3KAKT    | 0.754802545 | None       | 0.121121236  | 6935   |
| STAD       | ZEB1   | RASMAPK    | 0.738573328 | None       | -0.144098442 | 6935   |
| STAD       | ZEB1   | TSCmTOR    | 0.994105824 | None       | 0.001446582  | 6935   |

1.1

| Analyzed Samples by Histology |       |      |          |
|-------------------------------|-------|------|----------|
| (n=31)                        | Total | Null | Analyzed |
| ACC                           | 93    | 13   | 80       |
| BLCA                          | 436   | 9    | 427      |
| BRCA                          | 1236  | 21   | 1215     |
| CESC                          | 312   | 3    | 309      |
| CHOL                          | 45    | 0    | 45       |
| COAD                          | 545   | 53   | 492      |
| DLBC                          | 48    | 0    | 48       |
| ESCA                          | 204   | 8    | 196      |
| GBM                           | 602   | 436  | 166      |
| HNSC                          | 604   | 38   | 566      |
| KICH                          | 91    | 0    | 91       |
| KIRC                          | 944   | 338  | 606      |
| KIRP                          | 352   | 29   | 323      |
| LGG                           | 529   | 0    | 529      |
| LIHC                          | 438   | 15   | 423      |
| LUAD                          | 641   | 65   | 576      |
| LUSC                          | 623   | 71   | 552      |
| MESO                          | 87    | 0    | 87       |
| OV                            | 608   | 296  | 312      |
| PAAD                          | 196   | 13   | 183      |
| PRAD                          | 566   | 16   | 550      |
| READ                          | 183   | 13   | 170      |
| SARC                          | 271   | 6    | 265      |
| SKCM                          | 479   | 6    | 473      |
| STAD                          | 511   | 99   | 412      |
| TGCT                          | 139   | 0    | 139      |
| THCA                          | 580   | 8    | 572      |
| THYM                          | 126   | 4    | 122      |
| UCEC                          | 583   | 28   | 555      |
| UCS                           | 57    | 0    | 57       |
| UVM                           | 80    | 0    | 80       |

1.2

| VIP vs Lead Gene P-values                                   |           |
|-------------------------------------------------------------|-----------|
| MAPK3 (mitogen-activated protein kinase 3)                  | 4.91E-238 |
| ZEB1 (zinc finger E-box binding homeobox 1)                 | 0         |
| NOS2 (nitric oxide synthase 2)                              | 0         |
| TEK (TEK receptor tyrosine kinase)                          | 2.28E-239 |
| PTCH1 (patched-1 protein)                                   | 1.56E-228 |
| EIF4G1 (eukaryotic translation initiation factor 4 gamma 1) | 6.31E-256 |
| GMPS (guanine monophosphate synthase)                       | 9.29E-233 |
| CDK2 (cyclin-dependent kinase 2)                            | 1.64E-249 |
| RUVBL1 (RuvB like AAA ATPase 1)                             | 4.02E-242 |
| TIMELESS (tim)                                              | 6.62E-225 |

1.3

|                                    | (+) Association | (-) Association | # Of Genes |
|------------------------------------|-----------------|-----------------|------------|
| Activating Invasion and Mets       | 70              | 76              | 146        |
| Avoiding Immune Destruction        | 40              | 82              | 122        |
| Deregulating Cellular Energetics   | 28              | 77              | 105        |
| Enabling Replicative Immortality   | 13              | 35              | 48         |
| Evading Growth Suppressors         | 5               | 74              | 79         |
| Genome Instability and Mutation    | 28              | 83              | 111        |
| Inducing Angiogenesis              | 30              | 37              | 67         |
| Resisting Cell Death               | 10              | 13              | 23         |
| Sustaining Proliferative Signaling | 96              | 127             | 223        |
| Tumor Promoting Inflammation       | 75              | 103             | 178        |

**Supplemental Figure 1. Analyzed sample numbers, p-values, and pertinent cancer hallmarks for the 760 target gene panel.**

**1.1)** Number of samples analyzed by tumor histology

**1.2)** VIP vs Lead Gene p-values,

**1.3)** Target-genes stratified by cancer hallmark



| ECTODERM |         |          |         |         |         |         |         |         |         |         |         |
|----------|---------|----------|---------|---------|---------|---------|---------|---------|---------|---------|---------|
|          | All     | Ectoderm | BRCA    | CESC    | GBM     | HNSC    | LGG     | LUSC    | READ    | SKCM    | UVM     |
| MAPK3    | 0.3120  | 0.3537   | 0.0964  | -0.0017 | 0.2263  | 0.1392  | 0.4552  | 0.2770  | 0.2033  | -0.1715 | -0.1609 |
| ZEB1     | 0.3621  | 0.4341   | 0.3440  | 0.3611  | -0.0398 | 0.1550  | -0.1824 | 0.3842  | 0.5468  | 0.3226  | 0.1933  |
| NOS2     | 0.3611  | 0.3186   | 0.1027  | -0.0353 | -0.0376 | -0.0352 | 0.3182  | 0.0518  | -0.1816 | 0.1315  | -0.1148 |
| TEK      | 0.3113  | 0.3336   | 0.4936  | 0.3813  | 0.3704  | 0.1800  | 0.3062  | 0.5188  | 0.4457  | 0.2351  | 0.1458  |
| PTCH1    | 0.3031  | 0.4040   | 0.2230  | 0.0095  | -0.0992 | 0.0040  | -0.0869 | 0.0707  | 0.0146  | -0.0923 | 0.2382  |
| EIF4G1   | -0.3216 | -0.4268  | -0.3901 | -0.1558 | -0.2865 | -0.1893 | -0.3336 | -0.3456 | -0.2330 | -0.2772 | -0.0213 |
| GMPS     | -0.3074 | -0.4698  | -0.4385 | -0.2199 | -0.3172 | -0.3239 | -0.2850 | -0.5018 | -0.1909 | 0.0158  | -0.0620 |
| CDK2     | -0.3186 | -0.4687  | -0.3478 | -0.2001 | -0.2826 | -0.1947 | -0.4429 | -0.3372 | -0.1683 | -0.2561 | 0.0487  |
| RUVBL1   | -0.3135 | -0.3270  | -0.4263 | -0.1571 | -0.1067 | -0.2456 | -0.4090 | -0.4065 | -0.3015 | -0.0388 | -0.0612 |
| TIMELESS | -0.3036 | -0.4284  | -0.4488 | -0.3193 | -0.2292 | -0.3152 | -0.3093 | -0.4516 | -0.3431 | -0.0534 | -0.0042 |

| ENDODERM |         |          |         |         |         |         |         |         |         |         |         |         |         |         |
|----------|---------|----------|---------|---------|---------|---------|---------|---------|---------|---------|---------|---------|---------|---------|
|          | All     | Endoderm | BLCA    | CHOL    | COAD    | ESCA    | LIHC    | LUAD    | PAAD    | PRAD    | STAD    | THCA    | THYM    | UCEC    |
| MAPK3    | 0.3120  | 0.3380   | 0.0840  | -0.0316 | 0.1961  | -0.0779 | 0.0403  | 0.0931  | -0.3481 | 0.1184  | -0.0387 | 0.0807  | 0.1247  | 0.0712  |
| ZEB1     | 0.3621  | 0.3348   | 0.2797  | 0.1345  | 0.5624  | 0.5958  | 0.0564  | 0.3695  | 0.4272  | 0.2290  | 0.7643  | 0.3922  | -0.0217 | 0.5233  |
| NOS2     | 0.3611  | 0.3428   | 0.1233  | -0.1647 | -0.0377 | -0.2033 | 0.0929  | 0.2647  | 0.0010  | -0.0464 | -0.0723 | 0.1557  | 0.1176  | 0.1501  |
| TEK      | 0.3113  | 0.2600   | 0.3414  | 0.2356  | 0.5555  | 0.4071  | 0.1877  | 0.4777  | 0.5500  | 0.1593  | 0.5571  | 0.3425  | 0.5010  | 0.4318  |
| PTCH1    | 0.3031  | 0.2879   | 0.1454  | 0.0122  | 0.1493  | 0.0856  | 0.0861  | 0.2215  | 0.3214  | 0.0207  | 0.2563  | 0.0323  | 0.3173  | 0.1815  |
| EIF4G1   | -0.3216 | -0.2064  | -0.2672 | -0.0939 | -0.2033 | -0.2011 | -0.1787 | -0.2377 | -0.1502 | -0.0686 | -0.3292 | -0.4659 | 0.0418  | -0.4116 |
| GMPS     | -0.3074 | -0.0928  | -0.2056 | -0.2998 | -0.2770 | -0.2878 | -0.1402 | -0.4512 | -0.1608 | -0.0396 | -0.4315 | -0.4152 | -0.3923 | -0.2285 |
| CDK2     | -0.3186 | -0.0563  | -0.0686 | -0.4479 | -0.2305 | -0.2869 | -0.0854 | -0.2531 | 0.0384  | 0.0259  | -0.3158 | -0.2506 | -0.2479 | -0.0819 |
| RUVBL1   | -0.3135 | -0.1886  | -0.1966 | -0.3331 | -0.3985 | -0.3879 | -0.1112 | -0.2898 | -0.3082 | -0.0105 | -0.4446 | 0.1271  | -0.4574 | -0.3865 |
| TIMELESS | -0.3036 | -0.1505  | -0.0694 | -0.3932 | -0.3433 | -0.4430 | -0.1009 | -0.3678 | -0.1605 | -0.0656 | -0.5386 | -0.2404 | -0.3190 | -0.3652 |

| MESODERM |         |          |         |         |         |         |         |         |         |         |         |         |
|----------|---------|----------|---------|---------|---------|---------|---------|---------|---------|---------|---------|---------|
|          | All     | Mesoderm | ACC     | DLBC    | KICH    | KIRC    | KIRP    | MESO    | OV      | SARC    | TGCT    | UCS     |
| MAPK3    | 0.3120  | 0.2252   | 0.0519  | -0.1208 | 0.3498  | 0.1308  | 0.0869  | -0.1559 | 0.0297  | 0.1396  | 0.0525  | 0.2202  |
| ZEB1     | 0.3621  | 0.4901   | 0.0255  | 0.0504  | 0.4232  | 0.4696  | 0.2750  | 0.3801  | 0.2475  | -0.0212 | 0.1890  | -0.0998 |
| NOS2     | 0.3611  | 0.4849   | 0.3165  | 0.2317  | 0.3432  | 0.2776  | 0.2337  | 0.4952  | 0.2452  | 0.2850  | 0.1633  | 0.1646  |
| TEK      | 0.3113  | 0.5131   | 0.3589  | 0.1020  | 0.5893  | 0.1107  | 0.4243  | 0.4955  | 0.2401  | 0.2486  | -0.0536 | 0.2982  |
| PTCH1    | 0.3031  | -0.0061  | -0.0768 | 0.0589  | -0.1956 | 0.0015  | 0.0873  | 0.1630  | -0.0347 | -0.0427 | -0.0070 | 0.2592  |
| EIF4G1   | -0.3216 | -0.3779  | -0.1728 | -0.2419 | -0.4865 | -0.2194 | -0.2494 | -0.1347 | -0.1163 | 0.0257  | -0.1888 | 0.2371  |
| GMPS     | -0.3074 | -0.3005  | -0.0245 | 0.0562  | -0.5384 | -0.3468 | -0.0905 | -0.1695 | -0.1779 | -0.0992 | -0.0794 | -0.1211 |
| CDK2     | -0.3186 | -0.2345  | -0.1798 | 0.1525  | 0.0186  | 0.1549  | -0.1156 | -0.0387 | -0.1533 | -0.1246 | -0.2531 | 0.0317  |
| RUVBL1   | -0.3135 | -0.4716  | 0.0553  | 0.0502  | -0.0667 | -0.3439 | -0.3142 | -0.2208 | -0.2133 | 0.0859  | -0.3611 | -0.1995 |
| TIMELESS | -0.3036 | -0.3717  | -0.1704 | 0.0553  | -0.1223 | -0.1824 | -0.2077 | -0.1352 | -0.1376 | -0.0970 | -0.4431 | 0.0721  |

## Supplemental Figure 2. Heat Map of R-values for Lead Gene Associations by Cancer

**Histology:** R-values for VIP vs lead genes for 31 individual cancer histologies. Results shown in conjunction R-values for entire TCGA dataset (1<sup>st</sup> data column) and germ-layer grouped results (2<sup>nd</sup> data column).

A.

| VIP      |         |                |          |                |
|----------|---------|----------------|----------|----------------|
| Gene     | All     | Ectoderm       | Endoderm | Mesoderm       |
| MAPK3    | 0.3120  | 0.3537         | 0.3380   | 0.2252         |
| ZEB1     | 0.3621  | <b>0.4341</b>  | 0.3348   | <b>0.4901</b>  |
| NOS2     | 0.3611  | 0.3186         | 0.3428   | <b>0.4849</b>  |
| TEK      | 0.3113  | 0.3336         | 0.2600   | <b>0.5131</b>  |
| PTCH1    | 0.3031  | <b>0.4040</b>  | 0.2879   | -0.0061        |
|          |         |                |          |                |
| Gene     | All     | Ectoderm       | Endoderm | Mesoderm       |
| EIF4G1   | -0.3216 | -0.4268        | -0.2064  | -0.3779        |
| GMPS     | -0.3074 | <b>-0.4698</b> | -0.0928  | -0.3005        |
| CDK2     | -0.3186 | <b>-0.4687</b> | -0.0563  | -0.2345        |
| RUVBL1   | -0.3135 | -0.3270        | -0.1886  | <b>-0.4716</b> |
| TIMELESS | -0.3036 | <b>-0.4284</b> | -0.1505  | -0.3717        |

B.

| PACAP    |         |          |               |          |
|----------|---------|----------|---------------|----------|
| Gene     | All     | Ectoderm | Endoderm      | Mesoderm |
| MAPK3    | 0.2005  | 0.0982   | 0.2167        | 0.2093   |
| ZEB1     | 0.3542  | 0.3340   | <b>0.4527</b> | 0.2073   |
| NOS2     | 0.1987  | 0.1741   | 0.1410        | 0.2823   |
| TEK      | 0.3508  | 0.3963   | 0.3423        | 0.3360   |
| PTCH1    | 0.1618  | 0.1713   | 0.1976        | 0.1865   |
|          |         |          |               |          |
| Gene     | All     | Ectoderm | Endoderm      | Mesoderm |
| EIF4G1   | -0.1174 | -0.1383  | 0.0026        | -0.0989  |
| GMPS     | -0.1128 | -0.1467  | 0.0295        | -0.1224  |
| CDK2     | -0.2204 | -0.3366  | 0.0167        | -0.2019  |
| RUVBL1   | -0.1761 | -0.1728  | -0.1164       | -0.1898  |
| TIMELESS | -0.2003 | -0.1882  | -0.1139       | -0.2722  |

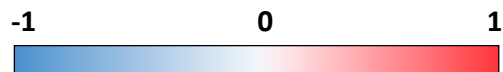

**Supplemental Figure 3. Heat Map of Lead Gene Associations by Tissue Germ Layer: A)**

Associations of VIP with lead genes by germinal layer with focus on  $R > [0.4]$ . VIP appears to have strongest associations with lead genes in the ectodermal and mesodermal layers. **B)**

Associations of PACAP with lead genes by germinal layer. PACAP appears to have weaker associations with lead genes in the ectodermal and mesodermal layers.
